# Supplementary material
Source: MDPI journal article supplement (https://www.mdpi.com/2076-3417/13/15/8819)
Supplement: s1 [file s1]

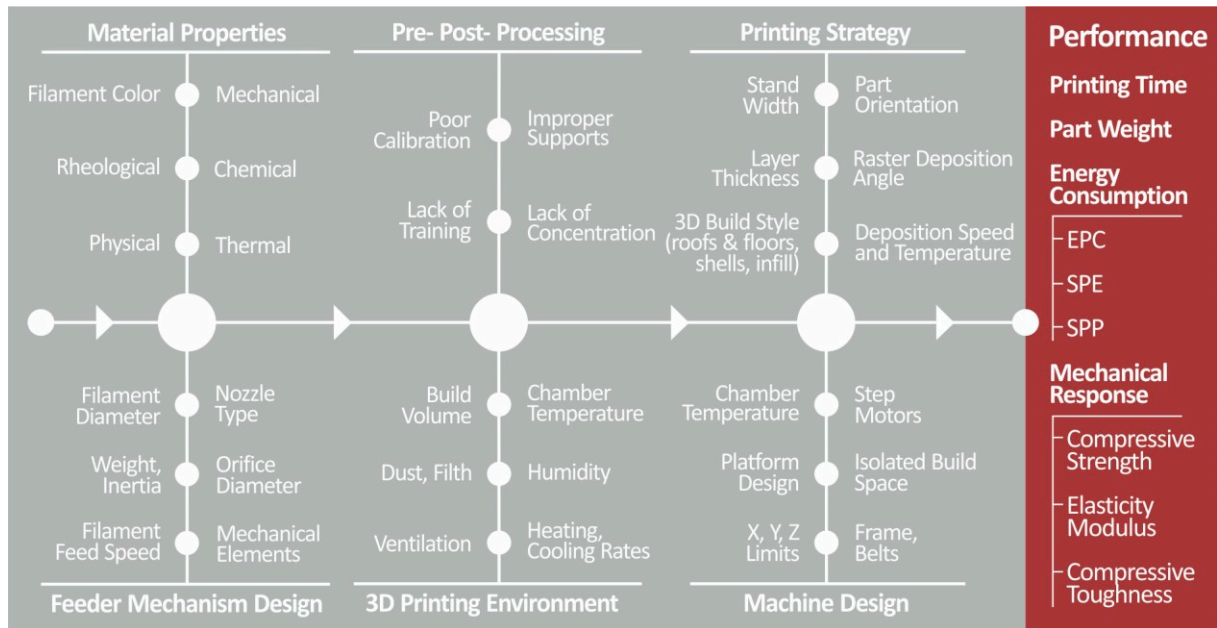

**Figure S1.** Ishikawa (fishbone) diagram showing the various variables influencing the energy/power consumption and the compressive response of the 3D printed items.

## Results

### *Specimens' morphological characteristics examination*

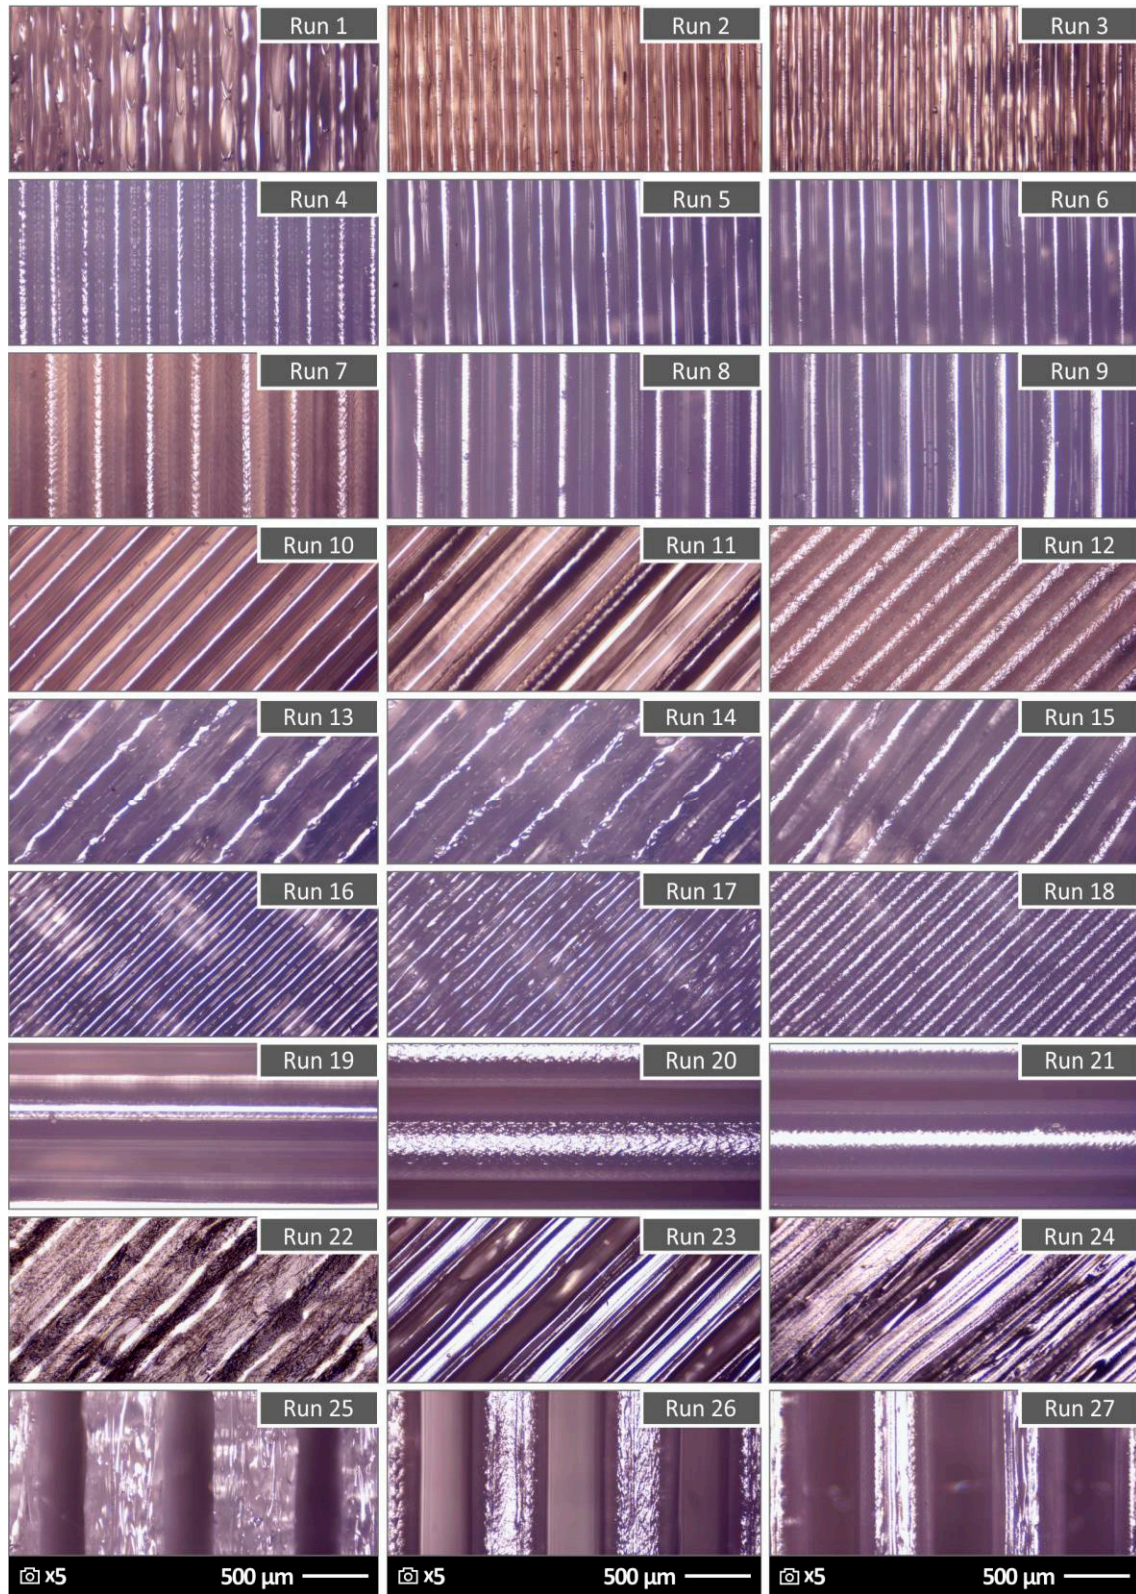

44

**Figure S2.** Optical stereoscope image of one randomly selected specimen from each run.

*Experimental results and Taguchi design*

**Table S1.** Measured weight, compressive strength, compressive modulus of elasticity and compressive Toughness for each experimental run and five replicas per run

| A/A | Run | Weight (g) | sB (MPa) | E (MPa) | Toughness (MJ/m <sup>3</sup> ) |
|-----|-----|------------|----------|---------|--------------------------------|
| 1   | 1   | 5.75       | 12.01    | 211.82  | 1.31                           |
| 2   |     | 5.67       | 8.31     | 185.27  | 1.04                           |
| 3   |     | 5.75       | 12.86    | 244.73  | 1.38                           |
| 4   |     | 5.51       | 12.97    | 241.49  | 1.49                           |
| 5   |     | 5.43       | 12.17    | 240.60  | 1.31                           |
| 6   | 2   | 5.59       | 13.63    | 231.87  | 1.65                           |
| 7   |     | 5.59       | 14.45    | 221.80  | 1.69                           |
| 8   |     | 5.42       | 15.77    | 220.47  | 1.87                           |
| 9   |     | 5.51       | 14.20    | 223.56  | 1.52                           |
| 10  |     | 5.34       | 14.03    | 224.38  | 1.68                           |
| 11  | 3   | 5.43       | 18.95    | 272.78  | 2.24                           |
| 12  |     | 5.51       | 18.80    | 254.56  | 2.16                           |
| 13  |     | 5.59       | 18.56    | 268.67  | 2.23                           |
| 14  |     | 5.51       | 17.26    | 256.56  | 2.20                           |
| 15  |     | 5.59       | 17.36    | 241.49  | 2.01                           |
| 16  | 4   | 6.93       | 13.66    | 254.42  | 1.25                           |
| 17  |     | 6.72       | 13.16    | 247.89  | 1.41                           |
| 18  |     | 6.91       | 14.53    | 259.51  | 1.48                           |
| 19  |     | 6.62       | 13.94    | 248.98  | 1.36                           |
| 20  |     | 6.53       | 12.84    | 238.18  | 1.51                           |
| 21  | 5   | 6.35       | 25.83    | 339.13  | 3.17                           |
| 22  |     | 6.18       | 21.87    | 317.00  | 2.54                           |
| 23  |     | 6.52       | 19.36    | 266.02  | 2.07                           |
| 24  |     | 6.27       | 21.26    | 277.27  | 2.36                           |
| 25  |     | 6.43       | 20.77    | 304.47  | 2.60                           |
| 26  | 6   | 6.57       | 24.38    | 256.80  | 3.13                           |
| 27  |     | 6.41       | 25.22    | 246.33  | 3.47                           |
| 28  |     | 6.49       | 23.50    | 251.96  | 3.13                           |
| 29  |     | 6.17       | 25.80    | 233.29  | 3.24                           |
| 30  |     | 6.25       | 21.68    | 231.13  | 2.80                           |
| 31  | 7   | 6.80       | 24.66    | 276.47  | 2.22                           |
| 32  |     | 6.89       | 28.26    | 334.49  | 2.93                           |
| 33  |     | 6.64       | 20.87    | 273.20  | 2.38                           |
| 34  |     | 6.72       | 29.90    | 280.02  | 2.88                           |
| 35  |     | 6.15       | 29.95    | 268.44  | 3.58                           |
| 36  | 8   | 8.55       | 26.33    | 260.73  | 3.45                           |
| 37  |     | 8.65       | 33.64    | 354.58  | 4.56                           |
| 38  |     | 8.86       | 35.64    | 336.80  | 4.60                           |
| 39  |     | 8.15       | 27.95    | 299.00  | 2.35                           |
| 40  |     | 7.84       | 35.24    | 341.71  | 4.62                           |
| 41  | 9   | 8.50       | 30.95    | 270.44  | 3.87                           |
| 42  |     | 8.40       | 32.11    | 249.80  | 3.96                           |
| 43  |     | 8.20       | 29.39    | 270.27  | 3.84                           |

|    |    |      |       |        |      |
|----|----|------|-------|--------|------|
| 44 |    | 8.40 | 29.40 | 265.40 | 3.86 |
| 45 |    | 8.30 | 29.71 | 251.78 | 3.75 |
| 46 |    | 8.04 | 31.03 | 264.44 | 4.14 |
| 47 |    | 8.13 | 33.32 | 321.58 | 4.24 |
| 48 | 10 | 8.04 | 31.17 | 294.02 | 4.08 |
| 49 |    | 8.32 | 32.60 | 275.89 | 4.26 |
| 50 |    | 8.22 | 29.41 | 249.09 | 3.69 |
| 51 |    | 6.44 | 34.86 | 309.80 | 4.58 |
| 52 |    | 6.30 | 34.90 | 309.71 | 4.75 |
| 53 | 11 | 6.37 | 34.19 | 284.00 | 4.41 |
| 54 |    | 6.37 | 34.34 | 289.56 | 4.34 |
| 55 |    | 6.51 | 34.15 | 260.44 | 4.63 |
| 56 |    | 8.00 | 25.89 | 193.18 | 3.64 |
| 57 |    | 8.00 | 21.45 | 224.16 | 2.74 |
| 58 | 12 | 8.10 | 23.13 | 224.16 | 3.20 |
| 59 |    | 8.10 | 23.89 | 250.29 | 3.16 |
| 60 |    | 7.81 | 19.69 | 255.60 | 2.94 |
| 61 |    | 5.50 | 8.86  | 54.24  | 1.27 |
| 62 |    | 5.50 | 10.44 | 77.73  | 1.40 |
| 63 | 13 | 5.58 | 10.04 | 72.07  | 1.34 |
| 64 |    | 5.50 | 10.76 | 61.49  | 1.41 |
| 65 |    | 5.58 | 9.86  | 66.91  | 1.32 |
| 66 |    | 5.42 | 11.21 | 79.09  | 1.49 |
| 67 |    | 5.59 | 11.25 | 77.49  | 1.48 |
| 68 | 14 | 5.25 | 9.53  | 74.20  | 1.34 |
| 69 |    | 5.51 | 10.32 | 77.20  | 1.51 |
| 70 |    | 5.42 | 9.62  | 76.82  | 1.39 |
| 71 |    | 5.89 | 2.15  | 27.18  | 0.13 |
| 72 |    | 5.40 | 2.42  | 18.09  | 0.19 |
| 73 | 15 | 6.63 | 6.39  | 48.76  | 0.82 |
| 74 |    | 5.40 | 2.61  | 32.69  | 0.34 |
| 75 |    | 5.28 | 1.64  | 14.20  | 0.15 |
| 76 |    | 6.83 | 16.29 | 113.73 | 1.97 |
| 77 |    | 6.83 | 18.29 | 151.60 | 2.36 |
| 78 | 16 | 7.29 | 16.49 | 142.02 | 2.18 |
| 79 |    | 7.76 | 16.59 | 120.82 | 1.98 |
| 80 |    | 7.51 | 18.32 | 114.09 | 2.29 |
| 81 |    | 6.87 | 17.10 | 135.44 | 2.04 |
| 82 |    | 7.14 | 17.89 | 148.13 | 2.34 |
| 83 | 17 | 7.22 | 17.95 | 160.42 | 2.37 |
| 84 |    | 7.14 | 16.52 | 151.00 | 2.19 |
| 85 |    | 7.14 | 18.54 | 134.00 | 2.30 |
| 86 |    | 6.98 | 11.66 | 118.84 | 1.60 |
| 87 | 18 | 6.98 | 15.32 | 109.24 | 1.90 |

|     |    |      |       |        |      |
|-----|----|------|-------|--------|------|
| 88  |    | 6.58 | 11.36 | 100.60 | 1.58 |
| 89  |    | 6.88 | 13.56 | 78.38  | 1.65 |
| 90  |    | 6.78 | 10.39 | 90.02  | 1.46 |
| 91  |    | 6.40 | 0.47  | 3.78   | 0.06 |
| 92  |    | 6.02 | 0.55  | 45.33  | 0.05 |
| 93  | 19 | 5.90 | 0.34  | 39.09  | 0.05 |
| 94  |    | 6.78 | 0.79  | 84.60  | 0.08 |
| 95  |    | 5.40 | 0.72  | 89.49  | 0.08 |
| 96  |    | 6.07 | 3.46  | 159.60 | 0.48 |
| 97  |    | 5.81 | 12.72 | 316.82 | 1.12 |
| 98  | 20 | 6.07 | 5.94  | 235.11 | 0.63 |
| 99  |    | 6.07 | 1.96  | 70.56  | 0.23 |
| 100 |    | 6.07 | 2.39  | 85.56  | 0.29 |
| 101 |    | 6.29 | 0.69  | 32.20  | 0.10 |
| 102 |    | 6.50 | 1.02  | 53.80  | 0.15 |
| 103 | 21 | 6.29 | 1.28  | 41.96  | 0.20 |
| 104 |    | 6.09 | 2.09  | 129.64 | 0.17 |
| 105 |    | 5.78 | 1.12  | 43.73  | 0.15 |
| 106 |    | 7.85 | 36.18 | 373.40 | 4.83 |
| 107 |    | 7.76 | 37.27 | 326.38 | 5.05 |
| 108 | 22 | 7.47 | 38.53 | 366.20 | 4.91 |
| 109 |    | 7.51 | 33.65 | 261.27 | 4.51 |
| 110 |    | 7.59 | 39.30 | 278.18 | 5.22 |
| 111 |    | 7.39 | 25.45 | 313.47 | 3.41 |
| 112 |    | 7.03 | 17.19 | 175.73 | 2.29 |
| 113 | 23 | 7.03 | 17.08 | 202.98 | 2.30 |
| 114 |    | 7.03 | 14.82 | 164.00 | 1.94 |
| 115 |    | 7.12 | 15.81 | 178.40 | 2.08 |
| 116 |    | 8.11 | 22.04 | 318.49 | 2.51 |
| 117 |    | 8.01 | 28.55 | 353.18 | 3.63 |
| 118 | 24 | 8.48 | 33.07 | 356.69 | 4.38 |
| 119 |    | 8.20 | 23.99 | 278.49 | 2.99 |
| 120 |    | 8.11 | 27.22 | 311.58 | 3.49 |
| 121 |    | 5.61 | 4.55  | 71.53  | 0.60 |
| 122 |    | 5.61 | 7.61  | 73.24  | 1.09 |
| 123 | 25 | 5.70 | 6.08  | 67.42  | 0.88 |
| 124 |    | 5.61 | 5.92  | 59.89  | 0.86 |
| 125 |    | 5.70 | 5.36  | 62.56  | 0.79 |
| 126 |    | 5.22 | 9.59  | 75.20  | 1.19 |
| 127 |    | 5.30 | 13.23 | 115.18 | 1.68 |
| 128 | 26 | 5.14 | 8.60  | 69.16  | 1.06 |
| 129 |    | 5.22 | 9.14  | 91.42  | 1.27 |
| 130 |    | 5.22 | 9.09  | 82.80  | 1.27 |
| 131 | 27 | 5.53 | 14.13 | 119.64 | 1.95 |

|          |  |      |       |        |      |
|----------|--|------|-------|--------|------|
| 132      |  | 5.44 | 12.00 | 121.84 | 1.72 |
| 133      |  | 5.53 | 8.50  | 84.93  | 1.14 |
| 134      |  | 5.66 | 11.48 | 88.71  | 1.53 |
| 135      |  | 5.44 | 12.98 | 126.07 | 1.74 |
| Min:     |  | 5.14 | 0.34  | 3.78   | 0.05 |
| Max:     |  | 8.86 | 39.30 | 373.40 | 5.22 |
| Average: |  | 6.58 | 17.37 | 189.46 | 2.18 |

**Table S2.** Measured for Printing Time, EPC, SPE, SPP for each experimental run and five replicas per run.

| A/A | Run | Printing Time (s) | EPC (MJ) | SPE (MJ/g) | SPP (kW/g) |
|-----|-----|-------------------|----------|------------|------------|
| 1   | 1   | 8820              | 0.922    | 0.160      | 0.018      |
| 2   |     | 8673              | 0.947    | 0.167      | 0.019      |
| 3   |     | 8518              | 0.997    | 0.173      | 0.020      |
| 4   |     | 9162              | 0.900    | 0.163      | 0.018      |
| 5   |     | 8602              | 0.911    | 0.168      | 0.019      |
| 6   | 2   | 3981              | 0.713    | 0.128      | 0.032      |
| 7   |     | 3712              | 0.695    | 0.124      | 0.033      |
| 8   |     | 3917              | 0.756    | 0.139      | 0.036      |
| 9   |     | 4034              | 0.742    | 0.135      | 0.033      |
| 10  |     | 4181              | 0.691    | 0.129      | 0.031      |
| 11  | 3   | 3027              | 0.738    | 0.136      | 0.045      |
| 12  |     | 3115              | 0.745    | 0.135      | 0.043      |
| 13  |     | 3289              | 0.724    | 0.129      | 0.039      |
| 14  |     | 3325              | 0.662    | 0.120      | 0.036      |
| 15  |     | 2970              | 0.695    | 0.124      | 0.042      |
| 16  | 4   | 3457              | 0.770    | 0.111      | 0.032      |
| 17  |     | 3266              | 0.824    | 0.123      | 0.038      |
| 18  |     | 3457              | 0.713    | 0.103      | 0.030      |
| 19  |     | 3665              | 0.846    | 0.128      | 0.035      |
| 20  |     | 3655              | 0.781    | 0.120      | 0.033      |
| 21  | 5   | 2486              | 0.432    | 0.068      | 0.027      |
| 22  |     | 2695              | 0.461    | 0.075      | 0.028      |
| 23  |     | 2697              | 0.457    | 0.070      | 0.026      |
| 24  |     | 2580              | 0.407    | 0.065      | 0.025      |
| 25  |     | 2642              | 0.396    | 0.062      | 0.023      |
| 26  | 6   | 2174              | 0.475    | 0.072      | 0.033      |
| 27  |     | 1927              | 0.457    | 0.071      | 0.037      |
| 28  |     | 2057              | 0.482    | 0.074      | 0.036      |
| 29  |     | 2015              | 0.457    | 0.074      | 0.037      |
| 30  |     | 2027              | 0.464    | 0.074      | 0.037      |
| 31  | 7   | 3656              | 0.461    | 0.068      | 0.019      |
| 32  |     | 3836              | 0.518    | 0.075      | 0.020      |
| 33  |     | 3821              | 0.450    | 0.068      | 0.018      |

|    |    |       |       |       |       |
|----|----|-------|-------|-------|-------|
| 34 |    | 3844  | 0.454 | 0.068 | 0.018 |
| 35 |    | 3718  | 0.457 | 0.074 | 0.020 |
| 36 |    | 1911  | 0.403 | 0.047 | 0.025 |
| 37 |    | 2023  | 0.342 | 0.040 | 0.020 |
| 38 | 8  | 2015  | 0.356 | 0.040 | 0.020 |
| 39 |    | 1881  | 0.349 | 0.043 | 0.023 |
| 40 |    | 1920  | 0.346 | 0.044 | 0.023 |
| 41 |    | 1469  | 0.374 | 0.044 | 0.030 |
| 42 |    | 1453  | 0.364 | 0.043 | 0.030 |
| 43 | 9  | 1463  | 0.342 | 0.042 | 0.029 |
| 44 |    | 1365  | 0.349 | 0.042 | 0.030 |
| 45 |    | 1400  | 0.374 | 0.045 | 0.032 |
| 46 |    | 6528  | 1.562 | 0.194 | 0.030 |
| 47 |    | 7163  | 1.674 | 0.206 | 0.029 |
| 48 | 10 | 7159  | 1.598 | 0.199 | 0.028 |
| 49 |    | 7486  | 1.602 | 0.193 | 0.026 |
| 50 |    | 6814  | 1.480 | 0.180 | 0.026 |
| 51 |    | 4612  | 0.482 | 0.075 | 0.016 |
| 52 |    | 4758  | 0.526 | 0.083 | 0.018 |
| 53 | 11 | 4795  | 0.554 | 0.087 | 0.018 |
| 54 |    | 4409  | 0.472 | 0.074 | 0.017 |
| 55 |    | 4503  | 0.486 | 0.075 | 0.017 |
| 56 |    | 3403  | 0.601 | 0.075 | 0.022 |
| 57 |    | 3443  | 0.551 | 0.069 | 0.020 |
| 58 | 12 | 3042  | 0.605 | 0.075 | 0.025 |
| 59 |    | 3056  | 0.598 | 0.074 | 0.024 |
| 60 |    | 3456  | 0.526 | 0.067 | 0.019 |
| 61 |    | 3988  | 0.835 | 0.152 | 0.038 |
| 62 |    | 4151  | 0.965 | 0.175 | 0.042 |
| 63 | 13 | 3992  | 0.875 | 0.157 | 0.039 |
| 64 |    | 4589  | 0.868 | 0.158 | 0.034 |
| 65 |    | 4055  | 0.961 | 0.172 | 0.042 |
| 66 |    | 2327  | 0.238 | 0.044 | 0.019 |
| 67 |    | 2457  | 0.248 | 0.044 | 0.018 |
| 68 | 14 | 2377  | 0.274 | 0.052 | 0.022 |
| 69 |    | 2420  | 0.238 | 0.043 | 0.018 |
| 70 |    | 2319  | 0.263 | 0.048 | 0.021 |
| 71 |    | 2035  | 0.342 | 0.058 | 0.029 |
| 72 |    | 1889  | 0.331 | 0.061 | 0.032 |
| 73 | 15 | 1833  | 0.331 | 0.050 | 0.027 |
| 74 |    | 1922  | 0.302 | 0.056 | 0.029 |
| 75 |    | 1896  | 0.310 | 0.059 | 0.031 |
| 76 |    | 11368 | 1.789 | 0.262 | 0.023 |
| 77 | 16 | 10072 | 1.876 | 0.275 | 0.027 |

|     |    |       |       |       |       |
|-----|----|-------|-------|-------|-------|
| 78  |    | 11359 | 1.832 | 0.251 | 0.022 |
| 79  |    | 10908 | 1.850 | 0.238 | 0.022 |
| 80  |    | 11193 | 1.674 | 0.223 | 0.020 |
| 81  |    | 8170  | 0.972 | 0.141 | 0.017 |
| 82  |    | 7697  | 1.087 | 0.152 | 0.020 |
| 83  | 17 | 7621  | 0.997 | 0.138 | 0.018 |
| 84  |    | 7817  | 1.008 | 0.141 | 0.018 |
| 85  |    | 7394  | 0.979 | 0.137 | 0.019 |
| 86  |    | 5850  | 0.983 | 0.141 | 0.024 |
| 87  |    | 5752  | 1.048 | 0.150 | 0.026 |
| 88  | 18 | 5975  | 1.105 | 0.168 | 0.028 |
| 89  |    | 6027  | 0.979 | 0.142 | 0.024 |
| 90  |    | 6246  | 1.145 | 0.169 | 0.027 |
| 91  |    | 2524  | 0.436 | 0.068 | 0.027 |
| 92  |    | 2772  | 0.385 | 0.064 | 0.023 |
| 93  | 19 | 2719  | 0.364 | 0.062 | 0.023 |
| 94  |    | 2488  | 0.410 | 0.061 | 0.024 |
| 95  |    | 2757  | 0.385 | 0.071 | 0.026 |
| 96  |    | 1324  | 0.270 | 0.044 | 0.034 |
| 97  |    | 1288  | 0.274 | 0.047 | 0.037 |
| 98  | 20 | 1317  | 0.306 | 0.050 | 0.038 |
| 99  |    | 1367  | 0.274 | 0.045 | 0.033 |
| 100 |    | 1429  | 0.317 | 0.052 | 0.037 |
| 101 |    | 1006  | 0.144 | 0.023 | 0.023 |
| 102 |    | 1061  | 0.158 | 0.024 | 0.023 |
| 103 | 21 | 993   | 0.144 | 0.023 | 0.023 |
| 104 |    | 975   | 0.137 | 0.022 | 0.023 |
| 105 |    | 1065  | 0.137 | 0.024 | 0.022 |
| 106 |    | 9564  | 1.411 | 0.180 | 0.019 |
| 107 |    | 9854  | 1.220 | 0.157 | 0.016 |
| 108 | 22 | 10022 | 1.390 | 0.186 | 0.019 |
| 109 |    | 10516 | 1.177 | 0.157 | 0.015 |
| 110 |    | 10195 | 1.303 | 0.172 | 0.017 |
| 111 |    | 5150  | 0.932 | 0.126 | 0.024 |
| 112 |    | 5398  | 0.965 | 0.137 | 0.025 |
| 113 | 23 | 5443  | 0.994 | 0.141 | 0.026 |
| 114 |    | 5328  | 1.004 | 0.143 | 0.027 |
| 115 |    | 4971  | 0.965 | 0.136 | 0.027 |
| 116 |    | 3816  | 0.454 | 0.056 | 0.015 |
| 117 |    | 4120  | 0.432 | 0.054 | 0.013 |
| 118 | 24 | 3776  | 0.450 | 0.053 | 0.014 |
| 119 |    | 3753  | 0.511 | 0.062 | 0.017 |
| 120 |    | 4091  | 0.493 | 0.061 | 0.015 |
| 121 | 25 | 3377  | 0.508 | 0.090 | 0.027 |

|          |    |          |       |       |       |
|----------|----|----------|-------|-------|-------|
| 122      |    | 3522     | 0.493 | 0.088 | 0.025 |
| 123      |    | 3151     | 0.464 | 0.081 | 0.026 |
| 124      |    | 3353     | 0.544 | 0.097 | 0.029 |
| 125      |    | 3397     | 0.511 | 0.090 | 0.026 |
| 126      |    | 1938     | 0.335 | 0.064 | 0.033 |
| 127      |    | 1825     | 0.360 | 0.068 | 0.037 |
| 128      | 26 | 1743     | 0.364 | 0.071 | 0.041 |
| 129      |    | 1741     | 0.378 | 0.072 | 0.042 |
| 130      |    | 1878     | 0.364 | 0.070 | 0.037 |
| 131      |    | 1329     | 0.176 | 0.032 | 0.024 |
| 132      |    | 1522     | 0.173 | 0.032 | 0.021 |
| 133      | 27 | 1344     | 0.180 | 0.033 | 0.024 |
| 134      |    | 1322     | 0.187 | 0.033 | 0.025 |
| 135      |    | 1382     | 0.184 | 0.034 | 0.024 |
| Min:     |    | 975.00   | 0.137 | 0.022 | 0.013 |
| Max:     |    | 11368.00 | 1.876 | 0.275 | 0.045 |
| Average: |    | 4075.06  | 0.661 | 0.100 | 0.026 |

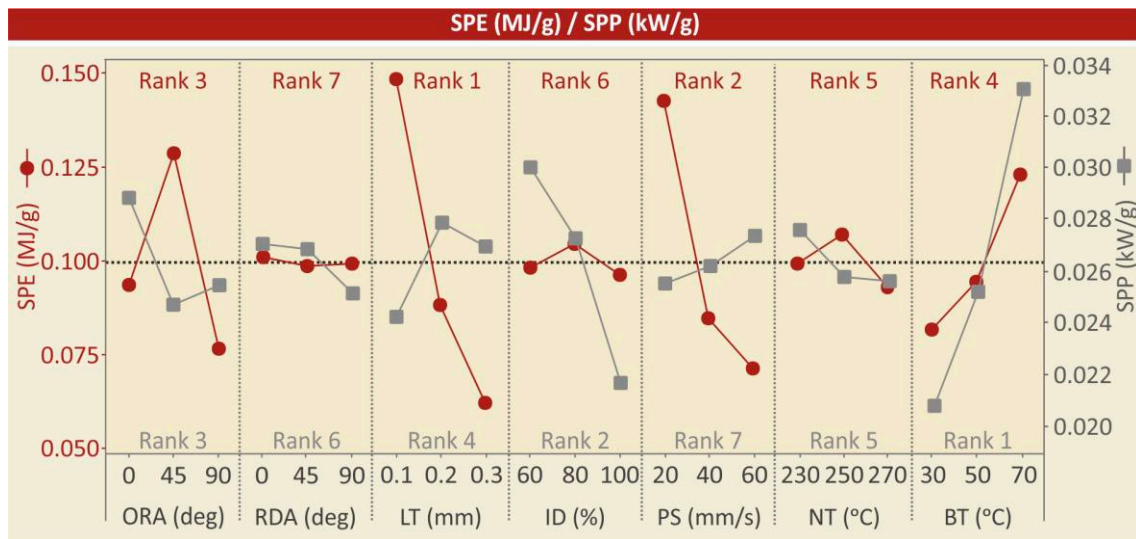

**Figure S3.** MEP: SPE (MJ/g) and SPP (kW/g).

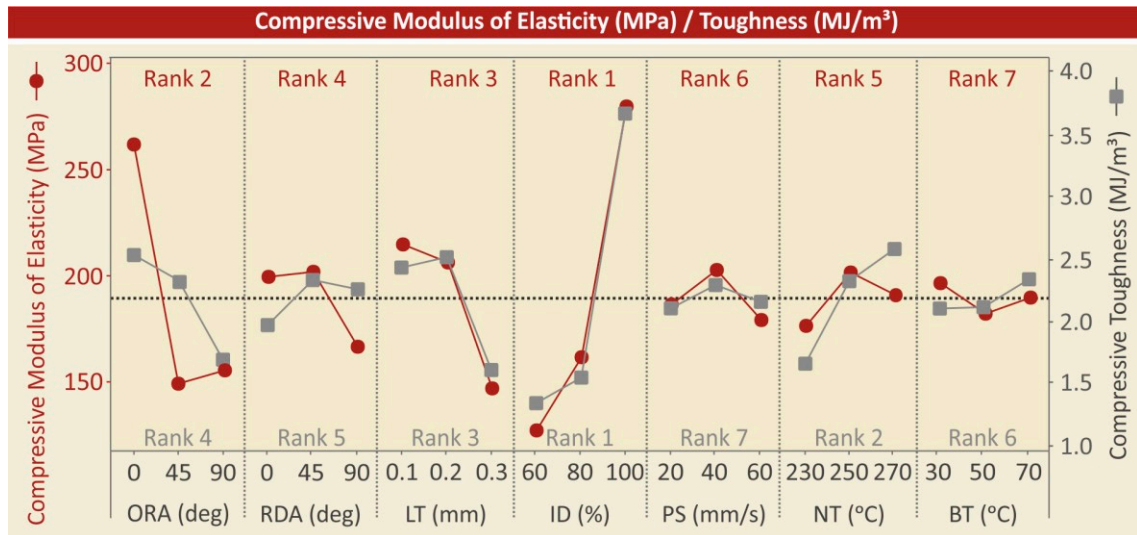

**Figure S4.** MEP: Compression modulus of elasticity (Mpa) and Toughness (MJ/m³).

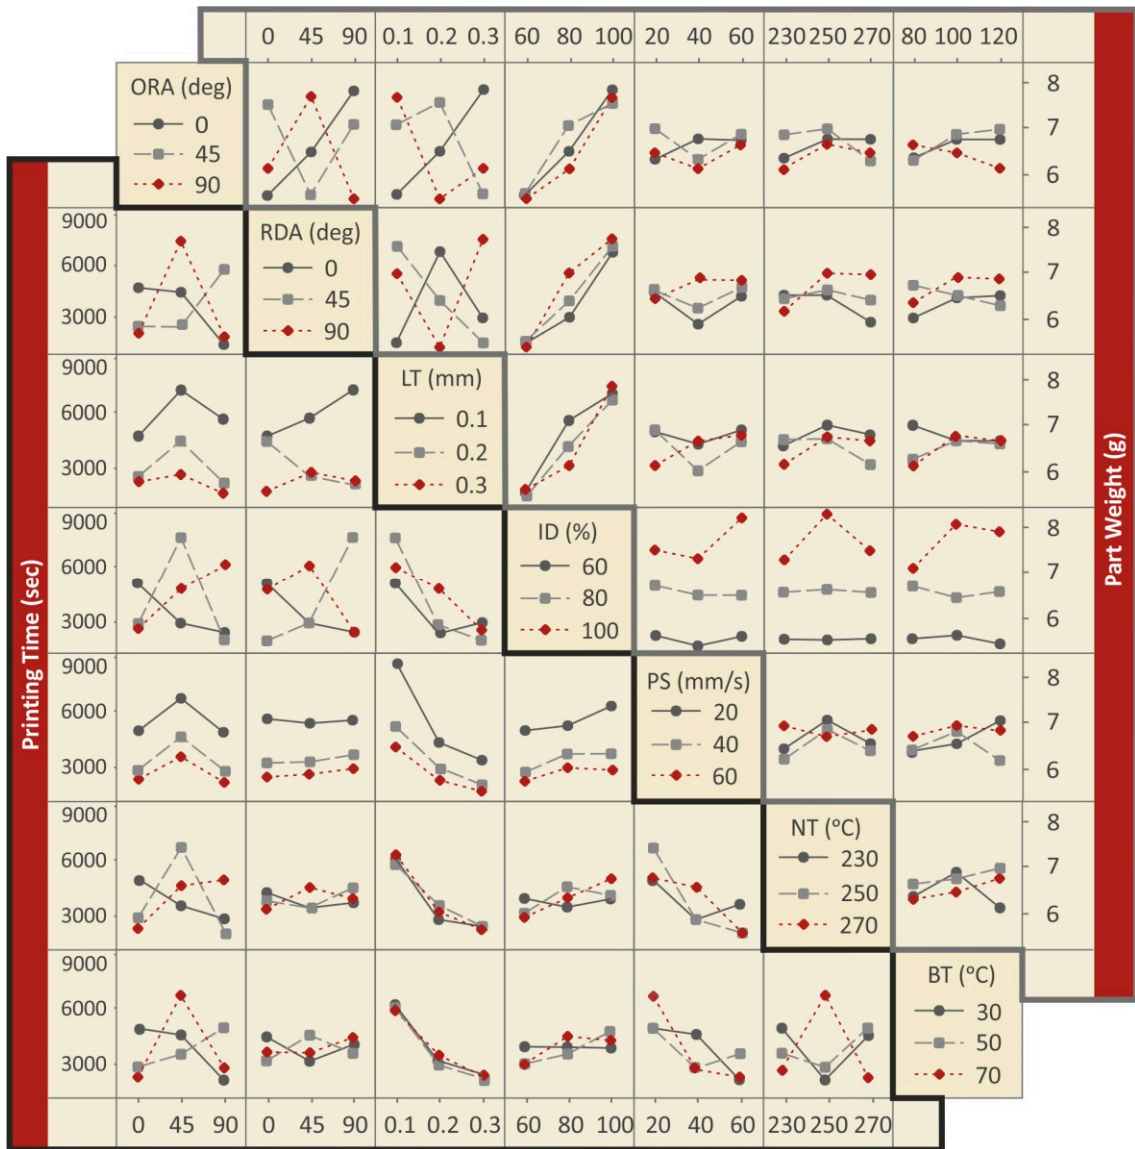

Figure S5. Interaction plots: printing time (s), part weight (g).

Regression analysis

**Table S3.** Polynomial ANOVA, Weight vs ORA, RDA, LT, ID, PS, NT, BT.

| Source                | DF     | Adj SS  | Adj MS  | F-Value | P-Value |
|-----------------------|--------|---------|---------|---------|---------|
| Regression            | 14     | 117.480 | 8.39144 | 45.20   | 0.000   |
| ORA                   | 1      | 0.651   | 0.65061 | 3.50    | 0.064   |
| RDA                   | 1      | 0.182   | 0.18244 | 0.98    | 0.324   |
| LT                    | 1      | 0.787   | 0.78747 | 4.24    | 0.042   |
| ID                    | 1      | 0.271   | 0.27061 | 1.46    | 0.230   |
| PS                    | 1      | 1.908   | 1.90803 | 10.28   | 0.002   |
| NT                    | 1      | 2.959   | 2.95881 | 15.94   | 0.000   |
| BT                    | 1      | 1.025   | 1.02471 | 5.52    | 0.020   |
| ORA <sup>2</sup>      | 1      | 1.269   | 1.26896 | 6.83    | 0.010   |
| RDA <sup>2</sup>      | 1      | 0.007   | 0.00736 | 0.04    | 0.842   |
| LT <sup>2</sup>       | 1      | 0.515   | 0.51483 | 2.77    | 0.098   |
| ID <sup>2</sup>       | 1      | 0.043   | 0.04332 | 0.23    | 0.630   |
| PS <sup>2</sup>       | 1      | 2.258   | 2.25776 | 12.16   | 0.001   |
| NT <sup>2</sup>       | 1      | 2.933   | 2.93281 | 15.80   | 0.000   |
| BT <sup>2</sup>       | 1      | 0.837   | 0.83667 | 4.51    | 0.036   |
| Error                 | 120    | 22.280  | 0.18566 |         |         |
| Total                 | 134    | 139.760 | 8.57710 |         |         |
| R <sup>2</sup>        | 84.06% |         |         |         |         |
| R <sup>2</sup> (adj)  | 82.20% |         |         |         |         |
| R <sup>2</sup> (pred) | 79.82% |         |         |         |         |

**Table S4.** Polynomial ANOVA, Printing Time vs ORA, RDA, LT, ID, PS, NT, BT.

| Source           | DF  | Adj SS    | Adj MS    | F-Value | P-Value |
|------------------|-----|-----------|-----------|---------|---------|
| Regression       | 14  | 883161179 | 63082941  | 96.61   | 0.000   |
| ORA              | 1   | 98626233  | 98626233  | 151.04  | 0.000   |
| RDA              | 1   | 143867    | 143867    | 0.22    | 0.640   |
| LT               | 1   | 86374971  | 86374971  | 132.27  | 0.000   |
| ID               | 1   | 2188019   | 2188019   | 3.35    | 0.070   |
| PS               | 1   | 45789886  | 45789886  | 70.12   | 0.000   |
| NT               | 1   | 107380    | 107380    | 0.16    | 0.686   |
| BT               | 1   | 702929    | 702929    | 1.08    | 0.302   |
| ORA <sup>2</sup> | 1   | 108103756 | 108103756 | 165.55  | 0.000   |
| RDA <sup>2</sup> | 1   | 625156    | 625156    | 0.96    | 0.330   |
| LT <sup>2</sup>  | 1   | 41129424  | 41129424  | 62.99   | 0.000   |
| ID <sup>2</sup>  | 1   | 1182597   | 1182597   | 1.81    | 0.181   |
| PS <sup>2</sup>  | 1   | 20644873  | 20644873  | 31.62   | 0.000   |
| NT <sup>2</sup>  | 1   | 93782     | 93782     | 0.14    | 0.705   |
| BT <sup>2</sup>  | 1   | 725926    | 725926    | 1.11    | 0.294   |
| Error            | 120 | 78359519  | 652996    |         |         |

|                       |        |           |          |
|-----------------------|--------|-----------|----------|
| Total                 | 134    | 961520698 | 63735937 |
| R <sup>2</sup>        | 91.85% |           |          |
| R <sup>2</sup> (adj)  | 90.90% |           |          |
| R <sup>2</sup> (pred) | 89.69% |           |          |

**Table S5.** Polynomial ANOVA, sB vs ORA, RDA, LT, ID, PS, NT, BT.

| Source                | DF     | Adj SS  | Adj MS  | F-Value | P-Value |
|-----------------------|--------|---------|---------|---------|---------|
| Regression            | 14     | 13000.4 | 928.60  | 67.08   | 0.000   |
| ORA                   | 1      | 68.8    | 68.81   | 4.97    | 0.028   |
| RDA                   | 1      | 122.8   | 122.85  | 8.87    | 0.004   |
| LT                    | 1      | 188.7   | 188.68  | 13.63   | 0.000   |
| ID                    | 1      | 1046.7  | 1046.71 | 75.61   | 0.000   |
| PS                    | 1      | 42.3    | 42.26   | 3.05    | 0.083   |
| NT                    | 1      | 103.6   | 103.55  | 7.48    | 0.007   |
| BT                    | 1      | 28.2    | 28.18   | 2.04    | 0.156   |
| ORA <sup>2</sup>      | 1      | 8.4     | 8.44    | 0.61    | 0.436   |
| RDA <sup>2</sup>      | 1      | 63.3    | 63.31   | 4.57    | 0.035   |
| LT <sup>2</sup>       | 1      | 324.1   | 324.13  | 23.41   | 0.000   |
| ID <sup>2</sup>       | 1      | 1496.6  | 1496.62 | 108.11  | 0.000   |
| PS <sup>2</sup>       | 1      | 46.4    | 46.42   | 3.35    | 0.070   |
| NT <sup>2</sup>       | 1      | 90.4    | 90.45   | 6.53    | 0.012   |
| BT <sup>2</sup>       | 1      | 35.5    | 35.48   | 2.56    | 0.112   |
| Error                 | 120    | 1661.2  | 13.84   |         |         |
| Total                 | 134    | 14661.6 | 942.44  |         |         |
| R <sup>2</sup>        | 88.67% |         |         |         |         |
| R <sup>2</sup> (adj)  | 87.35% |         |         |         |         |
| R <sup>2</sup> (pred) | 85.66% |         |         |         |         |

**Table S6.** Polynomial ANOVA, E vs ORA, RDA, LT, ID, PS, NT, BT.

| Source           | DF | Adj SS  | Adj MS | F-Value | P-Value |
|------------------|----|---------|--------|---------|---------|
| Regression       | 14 | 1136526 | 81180  | 43.86   | 0.000   |
| ORA              | 1  | 208165  | 208165 | 112.47  | 0.000   |
| RDA              | 1  | 3128    | 3128   | 1.69    | 0.196   |
| LT               | 1  | 8442    | 8442   | 4.56    | 0.035   |
| ID               | 1  | 30988   | 30988  | 16.74   | 0.000   |
| PS               | 1  | 10596   | 10596  | 5.72    | 0.018   |
| NT               | 1  | 9808    | 9808   | 5.30    | 0.023   |
| BT               | 1  | 3781    | 3781   | 2.04    | 0.156   |
| ORA <sup>2</sup> | 1  | 107201  | 107201 | 57.92   | 0.000   |
| RDA <sup>2</sup> | 1  | 10574   | 10574  | 5.71    | 0.018   |
| LT <sup>2</sup>  | 1  | 19362   | 19362  | 10.46   | 0.002   |

|                       |        |         |       |       |       |
|-----------------------|--------|---------|-------|-------|-------|
| ID <sup>2</sup>       | 1      | 52396   | 52396 | 28.31 | 0.000 |
| PS <sup>2</sup>       | 1      | 11853   | 11853 | 6.40  | 0.013 |
| NT <sup>2</sup>       | 1      | 9495    | 9495  | 5.13  | 0.025 |
| BT <sup>2</sup>       | 1      | 3397    | 3397  | 1.84  | 0.178 |
| Error                 | 120    | 222105  | 1851  |       |       |
| Total                 | 134    | 1358631 | 83031 |       |       |
| R <sup>2</sup>        | 83.65% |         |       |       |       |
| R <sup>2</sup> (adj)  | 81.75% |         |       |       |       |
| R <sup>2</sup> (pred) | 79.31% |         |       |       |       |

**Table S7.** Polynomial ANOVA, Toughness vs ORA, RDA, LT, ID, PS, NT, BT.

| Source                | DF     | Adj SS  | Adj MS  | F-Value | P-Value |
|-----------------------|--------|---------|---------|---------|---------|
| Regression            | 14     | 216.739 | 15.4813 | 59.30   | 0.000   |
| ORA                   | 1      | 0.000   | 0.0000  | 0.00    | 0.989   |
| RDA                   | 1      | 2.272   | 2.2715  | 8.70    | 0.004   |
| LT                    | 1      | 4.482   | 4.4818  | 17.17   | 0.000   |
| ID                    | 1      | 19.635  | 19.6352 | 75.21   | 0.000   |
| PS                    | 1      | 0.829   | 0.8292  | 3.18    | 0.077   |
| NT                    | 1      | 1.524   | 1.5240  | 5.84    | 0.017   |
| BT                    | 1      | 0.177   | 0.1766  | 0.68    | 0.413   |
| ORA <sup>2</sup>      | 1      | 1.319   | 1.3186  | 5.05    | 0.026   |
| RDA <sup>2</sup>      | 1      | 1.346   | 1.3464  | 5.16    | 0.025   |
| LT <sup>2</sup>       | 1      | 7.318   | 7.3181  | 28.03   | 0.000   |
| ID <sup>2</sup>       | 1      | 27.481  | 27.4805 | 105.26  | 0.000   |
| PS <sup>2</sup>       | 1      | 0.772   | 0.7718  | 2.96    | 0.088   |
| NT <sup>2</sup>       | 1      | 1.284   | 1.2835  | 4.92    | 0.028   |
| BT <sup>2</sup>       | 1      | 0.303   | 0.3033  | 1.16    | 0.283   |
| Error                 | 120    | 31.330  | 0.2611  |         |         |
| Total                 | 134    | 248.069 | 15.7424 |         |         |
| R <sup>2</sup>        | 87.37% |         |         |         |         |
| R <sup>2</sup> (adj)  | 85.90% |         |         |         |         |
| R <sup>2</sup> (pred) | 84.02% |         |         |         |         |

**Table S8.** Polynomial ANOVA, EPC vs ORA, RDA, LT, ID, PS, NT, BT.

| Source     | DF | Adj SS  | Adj MS  | F-Value | P-Value |
|------------|----|---------|---------|---------|---------|
| Regression | 14 | 21.9536 | 1.56812 | 168.97  | 0.000   |
| ORA        | 1  | 2.9171  | 2.91709 | 314.32  | 0.000   |
| RDA        | 1  | 0.0001  | 0.00010 | 0.01    | 0.918   |
| LT         | 1  | 0.8441  | 0.84412 | 90.96   | 0.000   |
| ID         | 1  | 0.2044  | 0.20439 | 22.02   | 0.000   |
| PS         | 1  | 1.6568  | 1.65682 | 178.53  | 0.000   |
| NT         | 1  | 0.3346  | 0.33457 | 36.05   | 0.000   |

|                       |        |         |         |        |       |
|-----------------------|--------|---------|---------|--------|-------|
| BT                    | 1      | 0.0102  | 0.01022 | 1.10   | 0.296 |
| ORA <sup>2</sup>      | 1      | 3.5089  | 3.50892 | 378.10 | 0.000 |
| RDA <sup>2</sup>      | 1      | 0.0022  | 0.00218 | 0.23   | 0.629 |
| LT <sup>2</sup>       | 1      | 0.2615  | 0.26148 | 28.18  | 0.000 |
| ID <sup>2</sup>       | 1      | 0.1509  | 0.15089 | 16.26  | 0.000 |
| PS <sup>2</sup>       | 1      | 0.9335  | 0.93351 | 100.59 | 0.000 |
| NT <sup>2</sup>       | 1      | 0.3384  | 0.33835 | 36.46  | 0.000 |
| BT <sup>2</sup>       | 1      | 0.0709  | 0.07086 | 7.64   | 0.007 |
| Error                 | 120    | 1.1137  | 0.00928 |        |       |
| Total                 | 134    | 23.0673 | 1.57740 |        |       |
| R <sup>2</sup>        | 95.17% |         |         |        |       |
| R <sup>2</sup> (adj)  | 94.61% |         |         |        |       |
| R <sup>2</sup> (pred) | 93.89% |         |         |        |       |

**Table S9.** Polynomial ANOVA, SPE vs ORA, RDA, LT, ID, PS, NT, BT.

| Source                | DF     | Adj SS   | Adj MS   | F-Value | P-Value |
|-----------------------|--------|----------|----------|---------|---------|
| Regression            | 14     | 0.416232 | 0.029731 | 233.02  | 0.000   |
| ORA                   | 1      | 0.042727 | 0.042727 | 334.88  | 0.000   |
| RDA                   | 1      | 0.000087 | 0.000087 | 0.68    | 0.411   |
| LT                    | 1      | 0.022830 | 0.022830 | 178.94  | 0.000   |
| ID                    | 1      | 0.001534 | 0.001534 | 12.02   | 0.001   |
| PS                    | 1      | 0.028753 | 0.028753 | 225.36  | 0.000   |
| NT                    | 1      | 0.003484 | 0.003484 | 27.30   | 0.000   |
| BT                    | 1      | 0.000415 | 0.000415 | 3.25    | 0.074   |
| ORA <sup>2</sup>      | 1      | 0.056603 | 0.056603 | 443.63  | 0.000   |
| RDA <sup>2</sup>      | 1      | 0.000056 | 0.000056 | 0.44    | 0.508   |
| LT <sup>2</sup>       | 1      | 0.008741 | 0.008741 | 68.51   | 0.000   |
| ID <sup>2</sup>       | 1      | 0.001595 | 0.001595 | 12.50   | 0.001   |
| PS <sup>2</sup>       | 1      | 0.014962 | 0.014962 | 117.27  | 0.000   |
| NT <sup>2</sup>       | 1      | 0.003561 | 0.003561 | 27.91   | 0.000   |
| BT <sup>2</sup>       | 1      | 0.001860 | 0.001860 | 14.58   | 0.000   |
| Error                 | 120    | 0.015311 | 0.000128 |         |         |
| Total                 | 134    | 0.431543 | 0.029859 |         |         |
| R <sup>2</sup>        | 96.45% |          |          |         |         |
| R <sup>2</sup> (adj)  | 96.04% |          |          |         |         |
| R <sup>2</sup> (pred) | 95.51% |          |          |         |         |

**Table S10.** Polynomial ANOVA, SPP vs ORA, RDA, LT, ID, PS, NT, BT.

| Source                | DF     | Adj SS   | Adj MS   | F-Value | P-Value |
|-----------------------|--------|----------|----------|---------|---------|
| Regression            | 14     | 0.006052 | 0.000432 | 34.29   | 0.000   |
| ORA                   | 1      | 0.000298 | 0.000298 | 23.62   | 0.000   |
| RDA                   | 1      | 0.000002 | 0.000002 | 0.19    | 0.663   |
| LT                    | 1      | 0.000196 | 0.000196 | 15.54   | 0.000   |
| ID                    | 1      | 0.000024 | 0.000024 | 1.86    | 0.175   |
| PS                    | 1      | 0.000000 | 0.000000 | 0.00    | 0.995   |
| NT                    | 1      | 0.000022 | 0.000022 | 1.73    | 0.191   |
| BT                    | 1      | 0.000007 | 0.000007 | 0.55    | 0.460   |
| ORA <sup>2</sup>      | 1      | 0.000177 | 0.000177 | 14.05   | 0.000   |
| RDA <sup>2</sup>      | 1      | 0.000018 | 0.000018 | 1.40    | 0.240   |
| LT <sup>2</sup>       | 1      | 0.000151 | 0.000151 | 11.97   | 0.001   |
| ID <sup>2</sup>       | 1      | 0.000059 | 0.000059 | 4.70    | 0.032   |
| PS <sup>2</sup>       | 1      | 0.000002 | 0.000002 | 0.13    | 0.714   |
| NT <sup>2</sup>       | 1      | 0.000020 | 0.000020 | 1.57    | 0.212   |
| BT <sup>2</sup>       | 1      | 0.000087 | 0.000087 | 6.87    | 0.010   |
| Error                 | 120    | 0.001513 | 0.000013 |         |         |
| Total                 | 134    | 0.007565 | 0.000445 |         |         |
| R <sup>2</sup>        | 80.00% |          |          |         |         |
| R <sup>2</sup> (adj)  | 77.67% |          |          |         |         |
| R <sup>2</sup> (pred) | 74.69% |          |          |         |         |

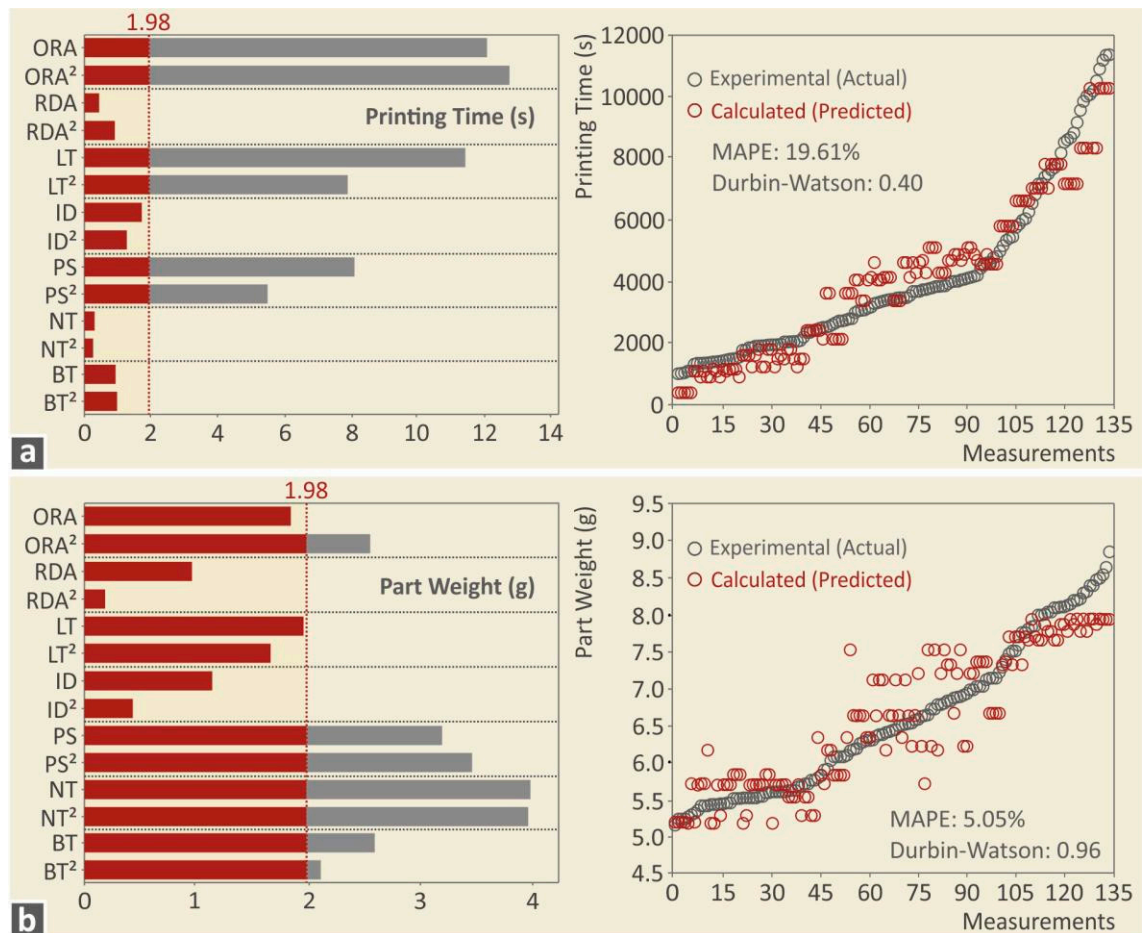

**Figure S6.** Pareto charts and experimental vs calculated values graph: (a) printing time (s), (b) part weight (g).

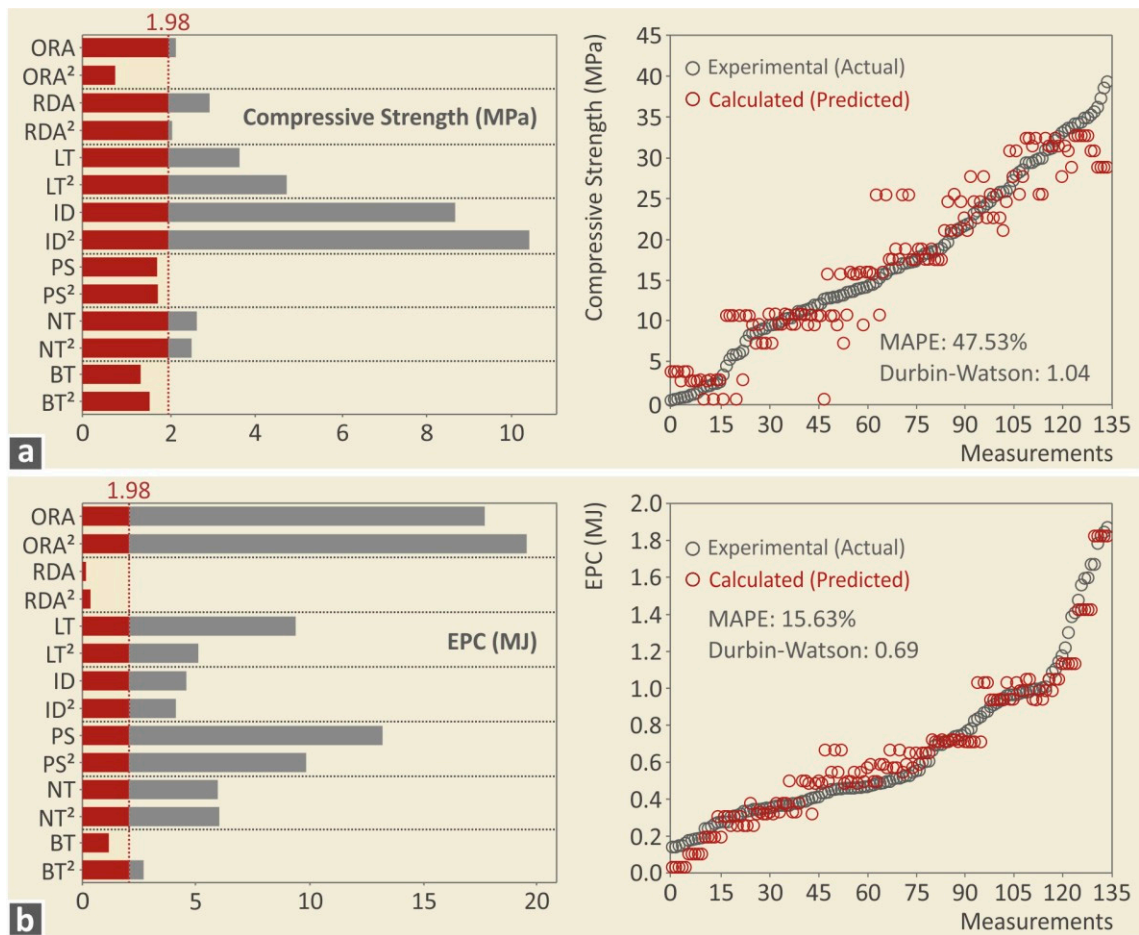

**Figure S7.** Pareto charts and experimental vs calculated values graph: (a) compressive strength (MPa), (b) EPC (MJ).

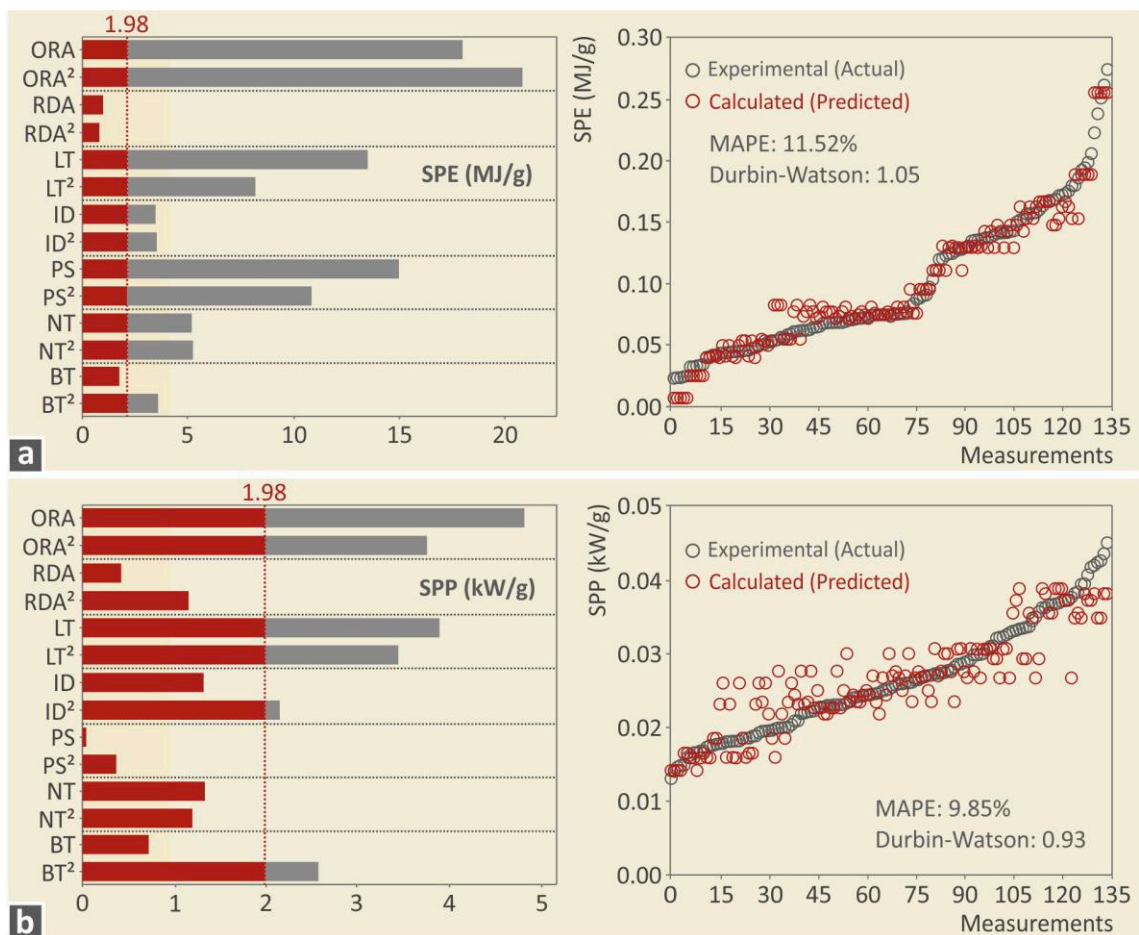

**Figure S8.** Pareto charts and experimental vs calculated values graph: (a) SPE (MJ/g), (b) SPP (kW/g).

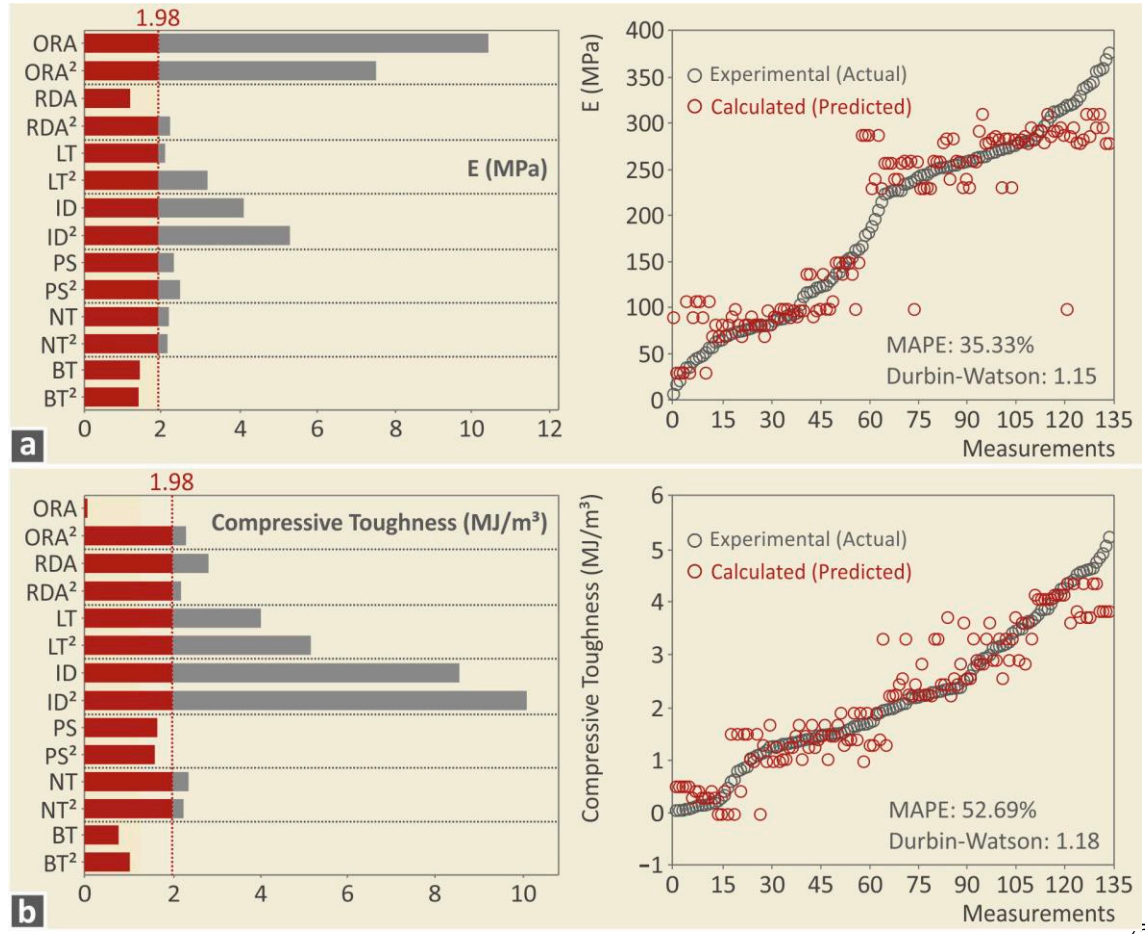

**Figure S9.** Pareto charts and experimental vs calculated values graph: (a) compressive modulus of elasticity (MPa), (b) compressive toughness (MJ/m³).

#### Confirmation

**Table S11.** Measured Weight, Compressive Strength, Compressive Modulus of Elasticity and Compressive Toughness for each experimental run and five replicas per run for the Confirmation Runs.

| A/A | Run | Weight (g) | sB (MPa) | E (MPa) | Toughness (MJ/m³) |
|-----|-----|------------|----------|---------|-------------------|
| 1   | 28  | 7.17       | 39.20    | 431.73  | 4.86              |
| 2   |     | 6.82       | 36.06    | 405.83  | 5.03              |
| 3   |     | 7.07       | 35.61    | 443.83  | 4.91              |
| 4   |     | 7.25       | 38.01    | 435.60  | 5.21              |
| 5   |     | 7.31       | 35.84    | 395.92  | 5.30              |
| 6   | 29  | 5.15       | 3.19     | 63.71   | 0.63              |
| 7   |     | 5.30       | 2.77     | 71.76   | 0.57              |
| 8   |     | 5.45       | 2.91     | 68.27   | 0.54              |
| 9   |     | 5.48       | 4.18     | 68.65   | 0.53              |
| 10  |     | 5.20       | 3.26     | 63.51   | 0.56              |

|          |      |       |        |      |
|----------|------|-------|--------|------|
| Min:     | 5.15 | 2.77  | 63.51  | 0.53 |
| Max:     | 7.31 | 39.20 | 443.83 | 5.30 |
| Average: | 6.22 | 20.10 | 244.88 | 2.81 |

**Table S12.** Measured Printing Time, EPC, SPE, SPP for each experimental run and five replicas per run for the Confirmation Runs.

| A/A | Run      | Printing Time<br>(s) | EPC (MJ) | SPE (MJ/g) | SPP (kW/g) |
|-----|----------|----------------------|----------|------------|------------|
| 1   | 28       | 4917                 | 0.832    | 0.126      | 0.024      |
| 2   |          | 4528                 | 0.742    | 0.119      | 0.024      |
| 3   |          | 4865                 | 0.767    | 0.119      | 0.022      |
| 4   |          | 4796                 | 0.806    | 0.121      | 0.023      |
| 5   |          | 4623                 | 0.756    | 0.113      | 0.022      |
| 6   | 29       | 735                  | 0.126    | 0.024      | 0.033      |
| 7   |          | 856                  | 0.104    | 0.020      | 0.023      |
| 8   |          | 833                  | 0.119    | 0.022      | 0.026      |
| 9   |          | 731                  | 0.126    | 0.023      | 0.031      |
| 10  |          | 959                  | 0.119    | 0.023      | 0.024      |
|     | Min:     | 731                  | 0.104    | 0.020      | 0.022      |
|     | Max:     | 4917                 | 0.832    | 0.126      | 0.033      |
|     | Average: | 2784.30              | 0.450    | 0.071      | 0.025      |
